# Supplementary material for: Relatives’ burden of caring for people screened positive for dementia in primary care
Source: Springer Nature journal article supplement (doi:10.1007/s00391-016-1119-9), 2016-08-17
Supplement: MOESM1 [file 12006758]

Supplemental Table : Summary of logistic regression models for each of the different dimensions of caregiver burden based on specifics of persons with dementia cared for (random effects for GP included)

|  |  | | Factors included in the model | | | | |  |  | Model |
| --- | --- | --- | --- | --- | --- | --- | --- | --- | --- | --- |
|  | Age | Age of care-giver | | Sex | MMSE | Activities of daily living | Depression | Employ-ment | Relation to care-giver | p-value |
|  |  |  | | male a |  |  |  | unemployed | Spouse |  |
| Dependent variable in the logistic regression |  |  | |  |  |  |  |  |  |  |
| **Objective burden due to caring** |  |  | |  |  |  |  |  |  |  |
| Extended care tasks | **OR=1.14 (p<0.043)**  **CI=1.00-**  **1.29** | **OR=0.88**  **(p<0.003)**  **CI=-0.81-**  **0.96** | | OR=1.14 (p<0.824)  CI=0.37**-**  3.53 | OR=0.85 (p<0.062)  CI=0.72**-**  1.01 | **OR=3.36**  **(p<0.003)**  **CI=1.52-**  **7.41** | OR=0.95  (p<0.821)  CI=0.63**-**  1.45 | OR=0.14 (p<0.106)  CI=0.01-  1.54 | OR=0.43 (p<0.292)  CI=0.09**-**  2.10 | p<0.001 |
| Basic care tasks | **OR=1.12 (p<0.002)**  **CI=1.04-**  **1.20** | OR=0.97  (p<0.174)  CI=-0.93-  1.01 | | **OR=0.33 (p<0.001)**  **CI=0.18-**  **0.62** | OR=0.94 (p<0.126)  CI=0.88**-**  1.02 | **OR=1.42**  **(p<0.005)**  **CI=1.12-**  **1.81** | OR=1.09  (p<0.397)  CI=0.89-  1.34 | OR=0.46  (p<0.076)  CI=0.19**-**  1.09 | OR=0.43 (p<0.062)  CI=0.18**-**  1.06 | p<0.001 |
| Motivation and Guidance | OR=1.11  (p<0.019)  CI=1.02-  1.20 | OR=0.93  (p<0.058)  CI=0.86-  1.00 | | OR=1.64 (p<0.355)  CI=0.57-  4.76 | **OR=0.83**  **(p<0.014)**  **CI=0.72-**  **0.96** | **OR=2.24 (p<0.003)**  **CI=1.33-**  **3.77** | OR=1.07  (p<0.521)  CI=0.87-  1.32 | OR=0.28  (p<0.074)  CI=0.07-  1.13 | OR=0.27  (p<0.101)  CI=0.06-  1.30 | p<0.001 |
| Emotional support | OR=0.96  (p<0.464)  CI=-0.87-  1.07 | OR=0.98  (p<0.292)  CI=-0.93-  1.02 | | **OR=3.05 (p<0.004)**  **CI=1.43-**  **6.50** | OR=0.96  (p<0.412)  CI=0.88-  1.06 | **OR=1.44 (p<0.001) CI=1.17-**  **1.79** | **OR=1.36 (p<0.001)**  **CI=1.14-**  **1.63** | OR=0.46  (p<0.162)  CI=0.16**-**  1.37 | OR=0.75  (p<0.516)  CI=0.31**-**  1.81 | p<0.001 |
| Supporting maintenance of social contacts | OR=1.10  (p<0.058)  CI=1.00**-**  1.22 | OR=0.95  (p<0.137)  CI=0.90**-**  1.02 | | OR=0.55 (p<0.203)  CI=0.22**-**  1.38 | **OR=0.79 (p<0.004)**  **CI=0.68-**  **0.92** | **OR=1.75 (p<0.017)**  **CI=1.11-**  **2.77** | **OR=1.38**  **(p<0.002)**  **CI=1.13-**  **1.68** | OR=0.48  (p<0.275)  CI=0.13**-**  1.82 | OR=0.36  (p<0.146)  CI=0.09**-**  1.43 | p<0.001 |
| Supervision | OR=1.06  (p<0.255)  CI=0.96**-**  1.16 | OR=1.00  (p<0.874)  CI=0.94**-**  1.05 | | OR=1.18 (p<0.530)  CI=0.62**-**  2.25 | OR=1.00  (p<0.973)  CI=0.93**-**  1.08 | **OR=2.07**  **(p<0.001)**  **CI=1.53-**  **2.80** | OR=0.99  (p<0.872)  CI=0.82**-**  1.19 | OR=1.09  (p<0.838)  CI=0.46**-**  2.59 | OR=1.44  (p<0.497)  CI=0.49**-**  4.21 | p<0.001 |
| **Subjective burden due to caring** |  |  | |  |  |  |  |  |  |  |
| *Burden due to behavior change* |  |  | |  |  |  |  |  |  |  |
| Late symptoms | OR=1.00  (p<0.961)  CI=0.83**-**  1.21 | OR=1.02  (p<0.685)  CI=0.94**-**  1.10 | | OR=0.65  (p<0.768)  CI=0.04**-**  11.33 | **OR=0.87**  **(p<0.030)**  **CI=0.77-**  **0.99** | OR=1.26  (p<0.379)  CI=0.75**-**  2.12 | OR=1.08  (p<0.677)  CI=0.74**-**  1.16 | OR=0.64  (p<0.736)  CI=0.05**-**  8.65 | OR=1.21  (p<0.707)  CI=0.45**-**  3.25 | p<0.032 |
| Cognition | OR=1.03 (p<0.371)  CI=0.96**-**  1.10 | OR=1.00 (p<0.983)  CI=0.96**-**  1.04 | | OR=1.37 (p<0.394)  CI=0.66**-**  2.83 | OR=0.92 (p<0.052)  CI=0.85**-**  1.00 | OR=1.22 (p<0.008)  CI=1.06**-**  1.41 | OR=1.06 (p<0.474)  CI=0.91**-**  1.22 | OR=0.80 (p<0.638)  CI=0.31**-**  2.04 | OR=0.81 (p<0.581)  CI=0.40**-**  1.68 | p<0.02 |
| Desoriented behavior | **OR=1.05 (p<0.027)**  **CI=1.00-**  **1.11** | OR=0.98 (p<0.382)  CI=0.94**-**  1.02 | | OR=1.22 (p<0.588)  CI=0.59**-**  2.50 | OR=0.98 (p<0.684)  CI=0.92**-**  1.06 | **OR=1.20 (p<0.010)**  **CI=1.05-**  **1.37** | OR=1.00 (p<0.959)  CI=0.89**-**  1.13 | OR=1.01 (p<0.961)  CI=0.50**-**  2.06 | OR=0.76 (p<0.543)  CI=0.31**-**  1.86 | p<0.001 |
| Aggression and resistance | **OR=1.10 (p<0.003)**  **CI=1.04-**  **1.19** | OR=1.00 (p<0.917)  CI=0.96**-**  1.05 | | OR=0.78 (p<0.481)  CI=0.39**-**  1.56 | OR=0.95 (p<0.187)  CI=0.88**-**  1.02 | OR=1.06 (p<0.429)  CI=0.92**-**  1.22 | OR=1.05 (p<0.502)  CI=0.92**-**  1.20 | OR=0.70 (p<0.554)  CI=0.21**-**  2.30 | OR=0.60 (p<0.271)  CI=0.24**-**  1.50 | P<0.015 |
| Depression | OR=1.00 (p<0.875)  CI=0.95-  1.06 | OR=0.98 (p<0.295)  CI=0.95-  1.01 | | OR=0.83 (p<0.589)  CI=0.43-  1.62 | OR=1.01 (p<0.753)  CI=0.95-  1.07 | **OR=1.32 (p<0.001)**  **CI=1.15-**  **1.52** |  | OR=1.05 (p<0.914)  CI=0.44**-**  2.50 | OR=0.86 (p<0.561)  CI=0.50**-**  1.46 | p<0.027 |
| Loss of relationship | OR=1.01  (p<0.816)  CI=0.94**-**  1.08 | OR=0.98  (p<0.362)  CI=0.93**-**  1.03 | | OR=0.84 (p<0.622)  CI=0.41**-**  1.72 | **OR=0.90 (p<0.028)**  **CI=0.82-**  **0.99** | **OR=1.43 (p<0.001)**  **CI=1.16-**  **1.77** | OR=1.01 (p<0.906)  CI=0.86**-**  1.18 | OR=0.56 (p<0.378)  CI=0.16**-**  2.04 | OR=0.62 (p<0.294)  CI=0.26**-**  1.52 | p<0.001 |
| *Burden due to perceived conflicts between needs and responsibilities to care* |  |  | |  |  |  |  |  |  |  |
| Personal constraints | OR=1.07  (p<0.045)  CI=1.00**-**  1.15 | OR=0.96  (p<0.105)  CI=0.93**-**  1.01 | | OR=1.01  (p<0.958)  CI=0.51**-**  2.05 | OR=0.97 (p<0.380)  CI=0.91**-**  1.04 | **OR=1.28**  **(p<0.001)**  **CI=1.11-**  **1.47** | OR=1.06 (p<0.262)  CI=0.95-  1.19 | OR=0.93 (p<0.845)  CI=0.43-  1.99 | **OR=0.45 (p<0.019)**  **CI=0.23-**  **0.87** | p<0.001 |
| Negative evaluation of one´s own caring | OR=1.01  (p<0.859)  CI=0.93**-**  1.09 | OR=0.99  (p<0.829)  CI=0.95**-**  1.04 | | OR=1.00  (p<0.993)  CI=0.50**-**  2.00 | **OR=0.90**  **(p<0.007)**  **CI=0.84-**  **0.97** | OR=1.04 (p<0.583)  CI=0.90**-**  1.21 | OR=1.08 (p<0.251)  CI=0.95-  1.23 | OR=1.59  (p<0.320)  CI=0.63-  4.02 | OR=0.66 (p<0.453)  CI=0.22**-**  1.98 | p<0.019 |
| Missing social appreciation | OR=0.99  (p<0.714)  CI=-0.93-  1.05 | OR=0.97  (p<0.130)  CI=-0.93-  1.01 | | OR=1.52 (p<0.267)  CI=0.72**-**  3.21 | OR=1.00 (p<0.930)  CI=0.93-  1.07 | **OR=1.30**  **(p<0.001)**  **CI=1.16-**  **1.45** | OR=1.05 (p<0.383)  CI=0.94**-**  1.17 | OR=0.70 (p<0.338)  CI=0.34**-**  1.46 | OR=0.76 (p<0.422)  CI=0.38**-**  1.51 | p<0.001 |
| Financial losses | OR=0.96  (p<0.210)  CI=0.89**-**  1.03 | OR=0.99  (p<0.645)  CI=0.94**-**  1.04 | | OR=1.04 (p<0.911)  CI=0.56**-**  1.94 | OR=0.94  (p<0.146)  CI=0.86**-**  1.02 | OR=1.06  (p<0.460)  CI=0.90**-**  1.25 | OR=1.02 (p<0.760)  CI=0.90**-**  1.16 | OR=0.67 (p<0.424)  CI=0.24**-**  1.82 | OR=1.53 (p<0.334)  CI=0.64**-**  3.66 | p<0.0567 |
| Personal development a | **OR=1.09**  **(p<0.039)**  **CI=1.00-**  **1.18** | OR=0.96  (p<0.091)  CI=0.91**-**  1.01 | | OR=1.40  (p<0.308)  CI=0.73-  2.68 | OR=1.01  (p<0.705)  CI=0.94**-**  1.09 | **OR=1.38**  **(p<0.001)**  **CI=1.20-**  **1.57** | OR=1.09 (p<0.181)  CI=0.96-  1.25 | OR=0.52 (p<0.119)  CI=0.23-  1.18 | OR=0.52 (p<0.146)  CI=0.21-  1.26 | p<0.001 |
| Missing institutional support | OR=1.07  (p<0.093)  CI=0.99**-**  1.16 | OR=1.00 (p<0.898)  CI=0.97-  1.03 | | OR=1.20  (p<0.638)  CI=0.55-  2.64 | OR=0.99  (p<0.865)  CI=0.93**-**  1.07 | OR=1.14 (p<0.092)  CI=0.98**-**  1.33 | OR=1.13 (p<0.097)  CI=0.98**-**  1.30 | OR=0.52 (p<0.131)  CI=0.22-  1.22 | OR=1.23 (p<0.587)  CI=0.58**-**  2.60 | p<0.0065 |
| *Burden due to role conflicts* |  |  | |  |  |  |  |  |  |  |
| Professional role conflicts | **OR=1.09**  **(p<0.018)**  **CI=1.02-**  **1.18** | OR=0.95  (p<0.057)  CI=0.90-  1.00 | | **OR=2.69**  **(p<0.029)**  **CI=1.10-**  **6.55** | OR=1.05 (p<0.519)  CI=0.91**-**  1.20 | OR=1.04 (p<0.692)  CI=0.85**-**  1.28 | OR=1.10 (p<0.175)  CI=0.96**-**  1.26 |  | OR=0.93 (p<0.905)  CI=0.28-  3.05 | p<0.001 |
| Family role conflicts | OR=1.03  (p<0.728)  CI=0.89**-**  1.18 | OR=0.99  (p<0.751)  CI=0.90**-**  1.08 | | OR=1.30  (p<0.678)  CI=0.37-  4.48 | OR=1.02 (p<0.713)  CI=0.91**-**  1.14 | OR=1.07  (p<0.662)  CI=0.78**-**  1.46 | OR=0.89  (p<0.314)  CI=0.71**-**  1.12 | **OR=178.61 (p<0.001)**  **CI=44.18-**  **722.16** | OR=0.50 (p<0.405)  CI=0.09-  2.63 | p<0.001 |
|  |  |  | |  |  |  |  |  |  |  |

Footnote: logistic regressions calculated to predict caregiver burden. Each line represents one regression analysis, a = reference category, dark fields indicate variable not included in respective regression analysis, CI=95% confidence interval
